# Meta population modelling of narwhals in East Canada and West Greenland

Lars Witting

Greenland Institute of Natural Resources,

P. O. Box 570, DK-3900 Nuuk, Greenland. Email: lawi@natur.gl

## ABSTRACT

This paper combines the catch allocation model for narwhals in East Canada and West Greenland with Bayesian population modelling of the eight summer aggregations of narwhals in the region. The catch allocation model allocates the catches in different hunting areas and seasons to the different summer aggregations, and the population models analyse the impact of these catches on the population dynamics of the eight narwhal aggregations.

The population models run from 1970, and the catch allocation model needs population trajectories from 1970 to the present in order to estimate the catches taken from the different summer aggregations during this period. In an initial run it uses linear transitions between the available abundance estimates; but more elaborate population trajectories are estimated by the fit of the population models to the abundance data. The two models are therefore run in an iterative manner until the catch histories that are estimated by the allocation model, and the abundance trajectories that are estimated by the population models, converge between runs.

Given a converged model and potential future catch options for the different hunts, the model estimates the probabilities of fulfilling management options for eight summer aggregations of narwhals.

## MODEL

In this paper I develop a meta population dynamic model for eight summer aggregations of narwhals in East Canada and West Greenland. For this I combine the catch allocation model that was developed at the 2014 meeting of the JWG (JWG 2014) with eight population dynamic models, which resemble the Bayesian models that have been used previously in the JWG in relation to harvest recommendations for narwhal and beluga in West Greenland.

### Catch allocation model

The catch allocation model is described in detail in JWG (2014), and it allocates catches taken in different hunting regions and seasons to eight summer aggregations of narwhals in East Canada and West Greenland.

The model uses an availability matrix (Table 2 and 1) to describe the availability of the narwhals from the different summer aggregations to the hunts in the different regions and seasons, and it uses a catch matrix (Tables 10 and 11) to describe the annual total removals (catches plus loss) in the different hunts.

| Hunt        | Season | Smith | Jones | Inglefield | Melville | Somerset | Admiralty | Eclipse | Baffin |
|-------------|--------|-------|-------|------------|----------|----------|-----------|---------|--------|
| Etah        | Spring | 1     | 0/n   | 0          | 0        | 0        | 0         | 0       | 0      |
| Qaanaaq     | Summer | 0     | 0     | 1          | 0        | 0        | 0         | 0       | 0      |
| Grise Fjord | Spring | 0/n   | 1     | 0/n        | 0        | 0/n      | 0         | 0       | 0      |
| Grise Fjord | Summer | 0     | 1     | 0          | 0        | 0        | 0         | 0       | 0      |
| Grise Fjord | Fall   | 0/n   | 1     | 0/n        | 0        | 0/n      | 0         | 0       | 0      |
| Upernavik   | Summer | 0     | 0     | 0          | 1        | 0        | 0         | 0       | 0      |
| Ummannaq    | Fall   | 0/n   | 0/n   | 0/n        | 1/9      | 1        | 0/42      | 0/26    | 0/n    |
| Disko Bay   | Winter | 0/n   | 0/n   | 0/n        | 1/7      | 0/n      | 1/42      | 1/6     | 0/n    |
| CCA         | Spring | 0     | 0     | 0          | 0        | 1        | 0/4       | 0/5     | 0      |
| CCA         | Summer | 0     | 0     | 0          | 0        | 1        | 0         | 0       | 0      |
| CCA         | Fall   | 0     | 0     | 0          | 0        | 1        | 7/42      | 1/26    | 0      |
| Arctic Bay  | Spring | 0     | 0     | 0          | 0        | 1        | 1         | 1/5     | 0      |
| Arctic Bay  | Summer | 0     | 0     | 0          | 0        | 0        | 1         | 0       | 0      |
| Arctic Bay  | Fall   | 0     | 0     | 0          | 0        | 0/n      | 1         | 6/26    | 0      |
| Pond Inlet  | Spring | 0     | 0/n   | 0/n        | 0        | 2/2      | 4/4       | 1       | 0/n    |
| Pond Inlet  | Summer | 0     | 0     | 0          | 0        | 0        | 0         | 1       | 0      |
| Pond Inlet  | Fall   | 0     | 0/n   | 0/n        | 0        | 0/14     | 4/42      | 1       | 0/n    |
| BIC         | Spring | 0     | 0/n   | 0/n        | 0        | 0/2      | 0/4       | 0/6     | 1      |
| BIC         | Summer | 0     | 0     | 0          | 0        | 0        | 0         | 0       | 1      |
| BIC         | Fall   | 0     | 0/n   | 0/n        | 0        | 0/5      | 10/42     | 16/26   | 1      |
| BIS         | Spring | 0     | 0     | 0          | 0        | 0/2      | 0/4       | 0/6     | n/n    |
| BIS         | Summer | 0     | 0     | 0          | 0        | 0        | 0         | 0       | 1      |
| BIS         | Fall   | 0     | 0     | 0          | 0        | 0/5      | 0/42      | 2/26    | n/n    |
| BIS         | Winter | 0     | 0     | 0          | 0        | 0/2      | 0/42      | 1/6     | n/n    |

Table 1: The availability of narwhals from summer aggregations to hunting regions [ $x/n$ : available ( $x$ ) over total ( $n$ )]. Black numbers are fixed, blue and red are beta distributions ( $\alpha = x + 1$ ;  $\beta = n + 1$ ); red for sensitivity by changes in  $n$ .

| Hunt        | Season | Smith | Jones | Inglefield | Melville | Somerset | Admiralty | Eclipse | Baffin |
|-------------|--------|-------|-------|------------|----------|----------|-----------|---------|--------|
| Etah        | Spring | 1.00  | 0.00  | 0.00       | 0.00     | 0.00     | 0.00      | 0.00    | 0.00   |
| Qaanaaq     | Summer | 0.00  | 0.00  | 1.00       | 0.00     | 0.00     | 0.00      | 0.00    | 0.00   |
| Grise Fjord | Spring | 0.00  | 1.00  | 0.00       | 0.00     | 0.00     | 0.00      | 0.00    | 0.00   |
| Grise Fjord | Summer | 0.00  | 1.00  | 0.00       | 0.00     | 0.00     | 0.00      | 0.00    | 0.00   |
| Grise Fjord | Fall   | 0.00  | 1.00  | 0.00       | 0.00     | 0.00     | 0.00      | 0.00    | 0.00   |
| Upernavik   | Summer | 0.00  | 0.00  | 0.00       | 1.00     | 0.00     | 0.00      | 0.00    | 0.00   |
| Ummannaq    | Fall   | 0.00  | 0.00  | 0.00       | 0.11     | 1.00     | 0.00      | 0.00    | 0.00   |
| Disko Bay   | Winter | 0.00  | 0.00  | 0.00       | 0.14     | 0.00     | 0.02      | 0.17    | 0.00   |
| CCA         | Spring | 0.00  | 0.00  | 0.00       | 0.00     | 1.00     | 0.00      | 0.00    | 0.00   |
| CCA         | Summer | 0.00  | 0.00  | 0.00       | 0.00     | 1.00     | 0.00      | 0.00    | 0.00   |
| CCA         | Fall   | 0.00  | 0.00  | 0.00       | 0.00     | 1.00     | 0.17      | 0.04    | 0.00   |
| Arctic Bay  | Spring | 0.00  | 0.00  | 0.00       | 0.00     | 1.00     | 1.00      | 0.2     | 0.00   |
| Arctic Bay  | Summer | 0.00  | 0.00  | 0.00       | 0.00     | 0.00     | 1.00      | 0.00    | 0.00   |
| Arctic Bay  | Fall   | 0.00  | 0.00  | 0.00       | 0.00     | 0.00     | 1.00      | 0.23    | 0.00   |
| Pond Inlet  | Spring | 0.00  | 0.00  | 0.00       | 0.00     | 1.00     | 1.00      | 1.00    | 0.00   |
| Pond Inlet  | Summer | 0.00  | 0.00  | 0.00       | 0.00     | 0.00     | 0.00      | 1.00    | 0.00   |
| Pond Inlet  | Fall   | 0.00  | 0.00  | 0.00       | 0.00     | 0.00     | 0.1       | 1.00    | 0.00   |
| BIC         | Spring | 0.00  | 0.00  | 0.00       | 0.00     | 0.00     | 0.00      | 0.00    | 1.00   |
| BIC         | Summer | 0.00  | 0.00  | 0.00       | 0.00     | 0.00     | 0.00      | 0.00    | 1.00   |
| BIC         | Fall   | 0.00  | 0.00  | 0.00       | 0.00     | 0.00     | 0.24      | 0.62    | 1.00   |
| BIS         | Spring | 0.00  | 0.00  | 0.00       | 0.00     | 0.00     | 0.00      | 0.00    | 1.00   |
| BIS         | Summer | 0.00  | 0.00  | 0.00       | 0.00     | 0.00     | 0.00      | 0.00    | 1.00   |
| BIS         | Fall   | 0.00  | 0.00  | 0.00       | 0.00     | 0.00     | 0.00      | 0.08    | 1.00   |
| BIS         | Winter | 0.00  | 0.00  | 0.00       | 0.00     | 0.00     | 0.00      | 0.17    | 1.00   |

Table 2: The availability of narwhals from summer aggregations to hunting regions. Black numbers are fixed, blue and red are point estimates of beta distributions; red for sensitivity only.

| Year | Smith       | Jones       | Inglefield | Melville   | Somerset    | Admiralty   | Eclipse     | Baffin      |
|------|-------------|-------------|------------|------------|-------------|-------------|-------------|-------------|
| 1975 | -           | -           | -          | -          | -           | 28260; 0.22 | -           | -           |
| 1981 | -           | -           | -          | -          | 32520; 0.1  | -           | -           | -           |
| 1985 | -           | -           | -          | -          | -           | 16400; 0.43 | -           | -           |
| 1986 | -           | -           | 8710; 0.25 | -          | -           | -           | -           | -           |
| 1996 | -           | -           | -          | -          | 45360; 0.35 | -           | -           | -           |
| 2001 | -           | -           | -          | -          | -           | -           | -           | -           |
| 2002 | -           | -           | -          | -          | 35810; 0.43 | -           | -           | -           |
| 2003 | -           | -           | -          | -          | -           | 5360; 0.5   | -           | 10070; 0.31 |
| 2004 | -           | -           | -          | -          | -           | -           | 20230; 0.36 | -           |
| 2007 | -           | -           | 8370; 0.25 | 6020; 0.86 | -           | -           | -           | -           |
| 2009 | -           | -           | -          | -          | -           | -           | -           | -           |
| 2010 | -           | -           | -          | -          | -           | 18050; 0.22 | -           | -           |
| 2012 | -           | -           | -          | 2980; 0.39 | -           | -           | -           | -           |
| 2013 | 16360; 0.65 | 12690; 0.33 | -          | -          | 49770; 0.2  | 35040; 0.42 | 10490; 0.24 | 17560; 0.35 |
| 2014 | -           | -           | -          | 3090; 0.5  | -           | -           | -           | -           |

Table 3: Abundance estimates with CVs for summer aggregations of narwhal.

To allocate the catches from the different hunts to the different summer aggregations, the model needs an additional matrix that describes the abundance in the different stocks per year. These abundance estimates are needed to estimate the relative availability of the different stocks to the different hunts, so that the catches from the different hunts can be allocated to the different summer aggregations.

The abundance matrix in the initial run of the model is constructed as linear transitions between the abundance estimates in the abundance estimate matrix of Table 3. In subsequent runs, the abundance matrix is given by the abundance trajectories that the previous run of the population dynamic models are estimating for the different summer aggregations of narwhals, given the catch histories that were estimated by the previous run of the allocation model. This iterative running of the two models was then conducted three to five times to ensure convergence of the catch histories and abundance trajectories.

### Population dynamic models

A separate population dynamic model was constructed for each of the eight summer aggregations of narwhals. All the models were based on the Bayesian modelling framework that I used in the model for beluga in West Greenland (see 2015-JWG/09 for details), i.e., they were age and sex structured with density regulated growth.

All models had the same priors on the biological parameters (see Table 4), and they were all initiated in 1970. All the summer aggregations with only one or two abundance estimates available (Smith, Jones, Eclipse, Baffin) and Admiralty seems to have had a very low exploitation rate in the beginning of the period, so for these I assumed that the population was close to the carrying capacity in 1970. For the remaining aggregations (Inglefield, Melville and Somerset), with a somewhat larger early exploitation, I assumed that the abundance in 1970 was lower than the carrying capacity.

The catch histories in a run of the population models were estimated by a run of the allocation model over the complete catch history starting in 1970, with the catch histories being drawn from a prior to capture the distribution of possible takes. For each aggregation, this prior was constructed from the distribution of possible total removals that was estimated for 2011 (Figure 1), together with two catch histories, a minimum catch history ( $c_{min}$ , represented by the 1th percentile of this distribution over time) and a maximum catch history ( $c_{max}$ , represented by the 99th percentile). The distribution was then rescaled to run from zero to one, with a value ( $x$ ) drawn at random from the distribution for each parameterisation, with the catch history calculated as  $c_t = c_{min,t} + x(c_{min,t} - c_{max,t})$ .

| $M$   | $N_0$     | $N^*$     | $p$       | $p_0$    | $b$       | $a_m$    | $\vartheta$ | $\gamma$ | $c_h$ | $\beta_a$ |
|-------|-----------|-----------|-----------|----------|-----------|----------|-------------|----------|-------|-----------|
| smith | -         | $2,80^U$  | $.97,1^u$ | $.5,1^u$ | $26,62^b$ | $8,12^u$ | .5          | $2,4^u$  | f     | -         |
| jones | -         | $2,60^U$  | $.97,1^u$ | $.5,1^u$ | $26,62^b$ | $8,12^u$ | .5          | $2,4^u$  | f     | -         |
| ingle | $1,25^U$  | $3,30^U$  | $.97,1^u$ | $.5,1^u$ | $26,62^b$ | $8,12^u$ | .5          | $2,4^u$  | f     | $.01,1^U$ |
| melvi | $.8,20^U$ | $3,30^U$  | $.97,1^u$ | $.5,1^u$ | $26,62^b$ | $8,12^u$ | .5          | $2,4^u$  | f     | -         |
| somer | $5,60^U$  | $25,90^U$ | $.97,1^u$ | $.5,1^u$ | $26,62^b$ | $8,12^u$ | .5          | $2,4^u$  | f     | -         |
| admir | -         | $10,40^U$ | $.97,1^u$ | $.5,1^u$ | $26,62^b$ | $8,12^u$ | .5          | $2,4^u$  | f     | -         |
| eclip | -         | $5,50^U$  | $.97,1^u$ | $.5,1^u$ | $26,62^b$ | $8,12^u$ | .5          | $2,4^u$  | f     | -         |
| baffi | -         | $3,60^U$  | $.97,1^u$ | $.5,1^u$ | $26,62^b$ | $8,12^u$ | .5          | $2,4^u$  | f     | -         |

Table 4: **Prior distributions** for the different models ( $M$ ). The list of parameters:  $N_0$  is the initial abundance,  $N^*$  the population dynamic equilibrium abundance,  $p$  the yearly survival,  $p_0$  the first year survival,  $b$  the birth rate,  $a_m$  the age of the first reproductive event,  $\vartheta$  the female fraction at birth,  $\gamma$  the density regulation,  $c_h$  the catch history, and  $\beta_i$  the abundance estimate bias ( $i$ : data reference). Abundance is given in thousands. The prior probability distribution is given by superscripts;  $p$ : fixed value,  $u$ : uniform (min,max),  $U$ : log uniform (min,max),  $b$ : beta ( $a,b$ ), and  $f$ : file distribution.

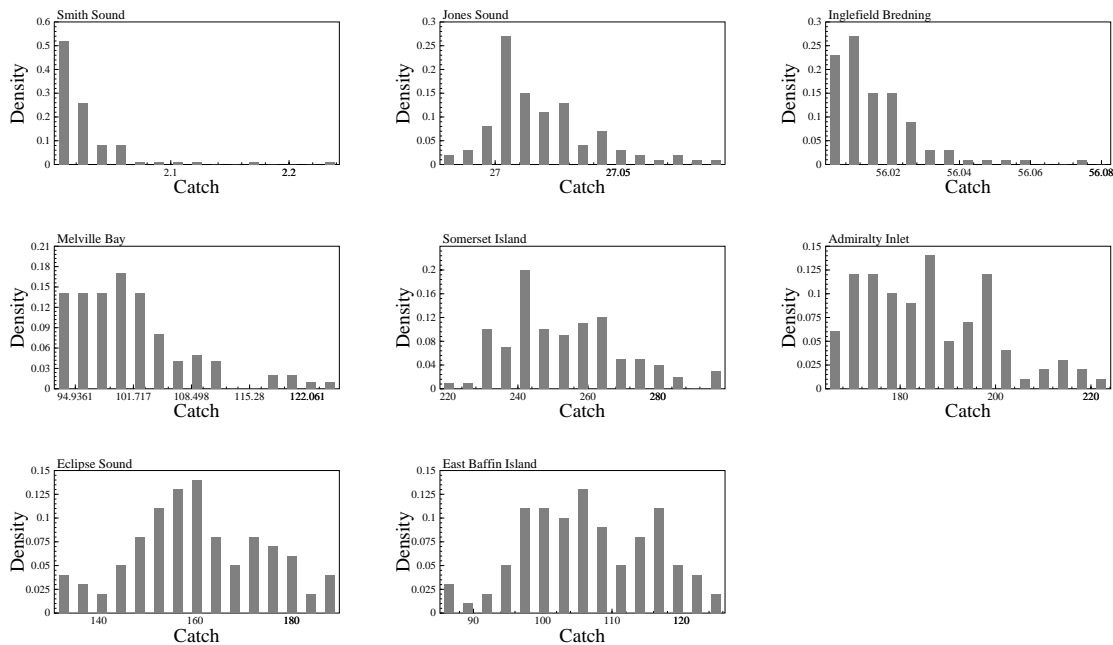

Figure 1: Catch distributions per summer aggregation, estimates for year 2011.

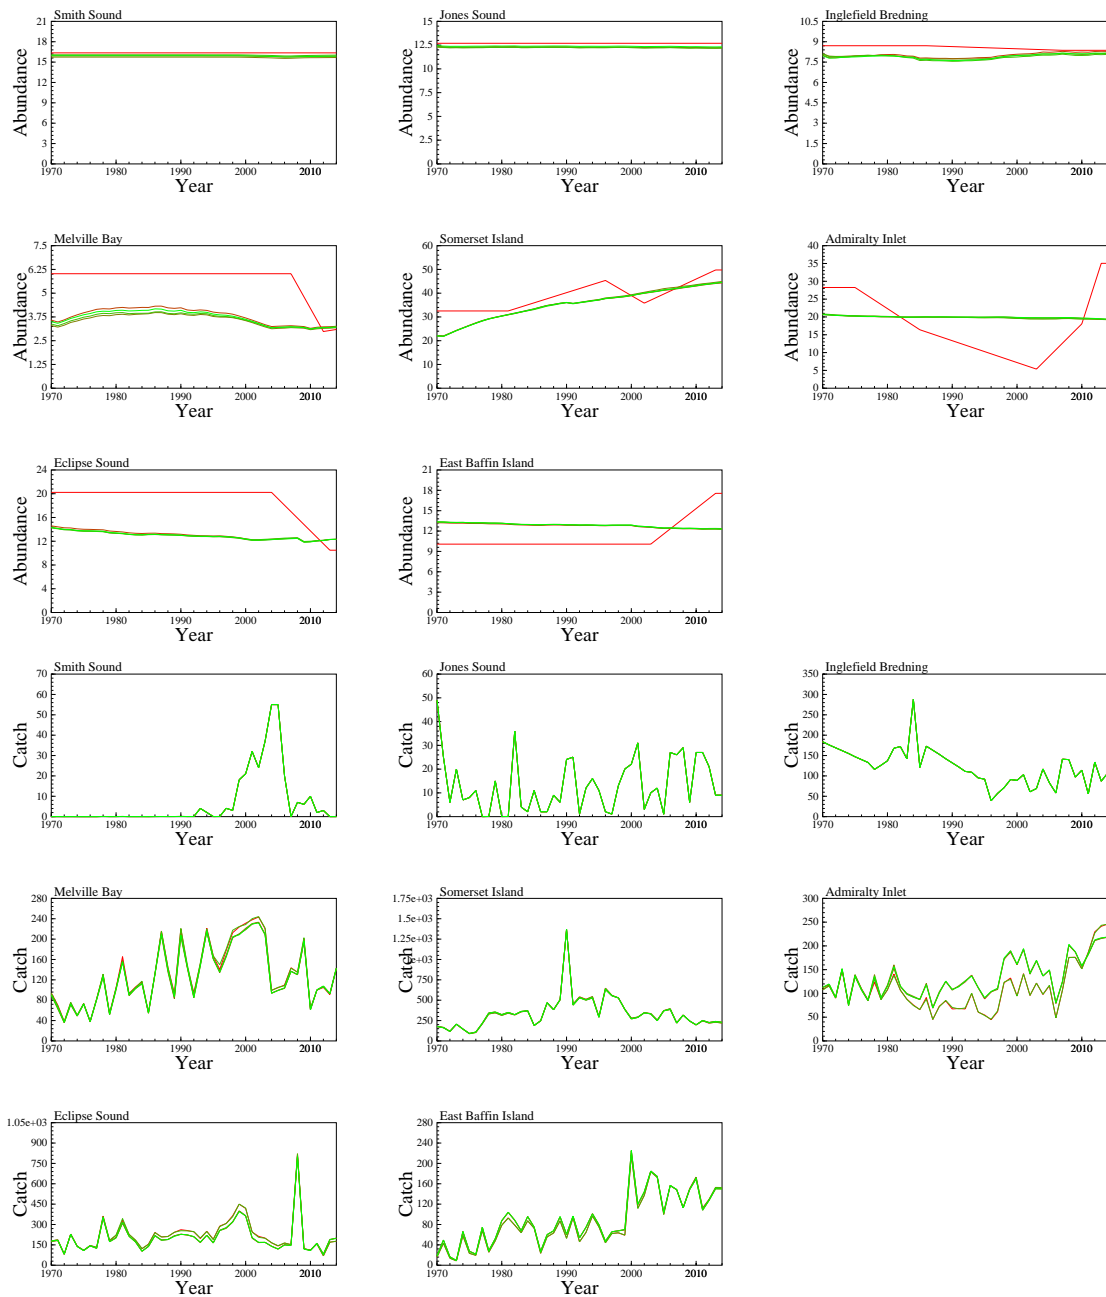

Figure 2: The convergence of the abundance trajectories and catch histories as a function of the number of iterations of the complete meta aggregation model, with iteration number increasing with colour transitions from clear red to clear green. Abundance is given in thousands.

| $M$   | $n_S$ | $n_R$ | Unique | Max |
|-------|-------|-------|--------|-----|
| smith | 500   | 5     | 4961   | 2   |
| jones | 500   | 5     | 4943   | 2   |
| ingle | 4000  | 5     | 4292   | 9   |
| melvi | 500   | 5     | 4800   | 3   |
| somer | 500   | 5     | 4769   | 3   |
| admir | 500   | 5     | 4936   | 2   |
| eclip | 500   | 5     | 4897   | 3   |
| baffi | 500   | 5     | 4908   | 3   |

Table 5: **Sampling statistics** for the different models ( $M$ ). The number of parameter sets in the sample ( $n_S$ ) and the resample ( $n_R$ ), the number of unique parameter sets in the resample, and the maximum number of occurrences of a unique parameter set in the resample.  $n_S$  and  $n_R$  are given in thousands.

## RESULTS

The convergence of the catch and abundance trajectories over the different iterations of the allocation and population dynamic models is shown in Figure 2.

The sampling statistics of the last run of the Bayesian population models are shown in Table 5. The estimated trajectories of the eight summer aggregations are shown in Figure 3, and the posterior parameter estimates in Table 6, with plots of the posterior and realised prior distributions given in Figures 5 to 12. The final estimates of the catch histories per summer aggregation are shown in Figure 4.

Let us assume a management objective that aim for increasing populations if these are below the maximum sustainable yield level, and allows for catches up to 90% of the maximum sustainable yield if the population is above the maximum sustainable yield level. Given this, Table 7 list the estimated total allowable takes for the different summer aggregations that will meet this criterion with probabilities from 0.5 to 0.95.

But management should define the total allowable takes for the different hunts (region and season), as these cannot generally be allocated directly to the different summer aggregation. Hence, Table 8 define possible total allowable takes for the different hunts, with Table 9 giving the associated estimates of the probabilities that these takes from 2015 to 2020 will allow the management objective to be fulfilled for the different summer aggregations. These latter probability estimates have 90% confidence limits that reflect the uncertainty of the summer aggregation origin of the animals taken in the different hunts. The C0 option in Table 8 is the average take over the five year period from 2009 to 2013.

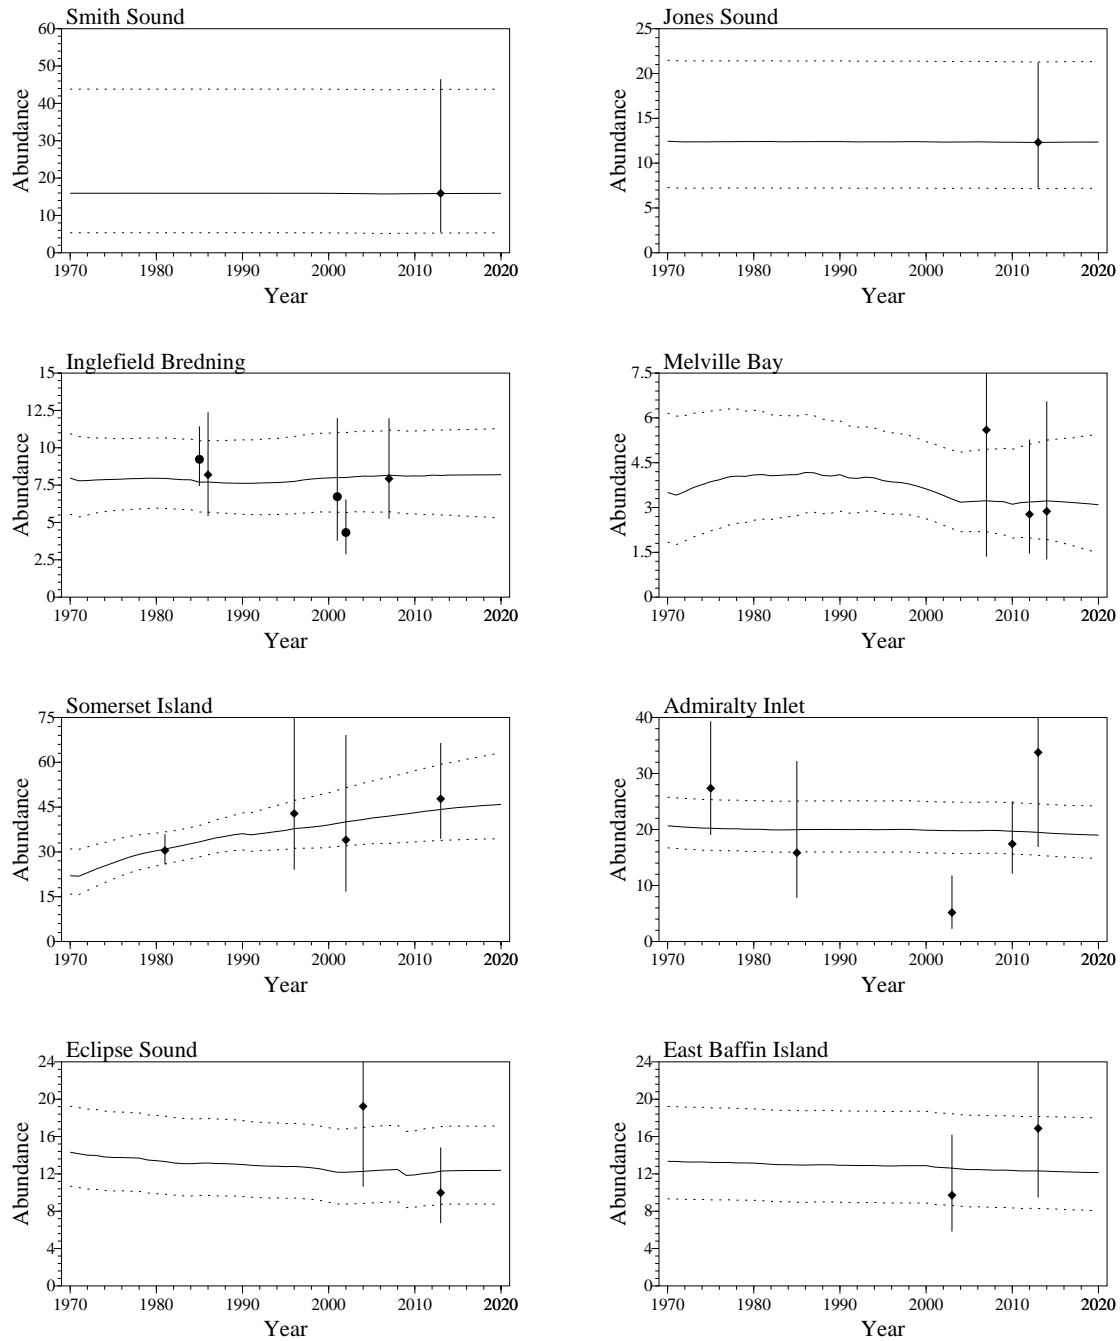

Figure 3: The trajectories of the different narwhal aggregations. Points with bars are the abundance estimates with 90% CI, solid curves the median, and dotted curves the 90% CI, of the estimated models. Abundance is given in thousands.

| $M$   |           | $N_0$ | $N^*$ | $r$  | msyr  | $p$ | $p_0$ | $b$ | $a_m$ | $\gamma$ | msyl |
|-------|-----------|-------|-------|------|-------|-----|-------|-----|-------|----------|------|
| smith | $x_{.5}$  | -     | 16    | .04  | .031  | .98 | .75   | .29 | 10    | 3        | .67  |
|       | $x_{.05}$ | -     | 5.4   | .019 | .014  | .97 | .52   | .22 | 8.2   | 2.1      | .62  |
|       | $x_{.95}$ | -     | 44    | .064 | .05   | .99 | .98   | .38 | 12    | 3.9      | .71  |
| jones | $x_{.5}$  | -     | 12    | .041 | .031  | .98 | .74   | .29 | 10    | 3        | .67  |
|       | $x_{.05}$ | -     | 7.3   | .019 | .014  | .97 | .53   | .22 | 8.2   | 2.1      | .62  |
|       | $x_{.95}$ | -     | 21    | .063 | .049  | .99 | .97   | .38 | 12    | 3.9      | .7   |
| ingle | $x_{.5}$  | 8     | 10    | .033 | .025  | .98 | .69   | .28 | 10    | 3        | .66  |
|       | $x_{.05}$ | 5.5   | 7.5   | .01  | .0079 | .97 | .51   | .2  | 8.2   | 2.1      | .61  |
|       | $x_{.95}$ | 11    | 22    | .065 | .051  | .99 | .97   | .38 | 12    | 3.9      | .71  |
| melvi | $x_{.5}$  | 3.5   | 7.1   | .043 | .033  | .98 | .77   | .3  | 9.9   | 3        | .67  |
|       | $x_{.05}$ | 1.8   | 4.2   | .021 | .016  | .97 | .53   | .22 | 8.2   | 2.1      | .62  |
|       | $x_{.95}$ | 6.2   | 24    | .065 | .051  | .99 | .98   | .38 | 12    | 3.9      | .71  |
| somer | $x_{.5}$  | 22    | 50    | .041 | .032  | .98 | .76   | .3  | 9.9   | 3        | .67  |
|       | $x_{.05}$ | 16    | 36    | .024 | .019  | .97 | .53   | .22 | 8.2   | 2.1      | .62  |
|       | $x_{.95}$ | 31    | 81    | .064 | .051  | .99 | .98   | .38 | 12    | 3.9      | .71  |
| admir | $x_{.5}$  | -     | 21    | .04  | .031  | .98 | .74   | .29 | 10    | 3        | .67  |
|       | $x_{.05}$ | -     | 17    | .018 | .014  | .97 | .52   | .22 | 8.2   | 2.1      | .62  |
|       | $x_{.95}$ | -     | 26    | .063 | .049  | .99 | .97   | .37 | 12    | 3.9      | .71  |
| eclip | $x_{.5}$  | -     | 14    | .041 | .032  | .98 | .75   | .29 | 10    | 3        | .67  |
|       | $x_{.05}$ | -     | 11    | .018 | .014  | .97 | .53   | .22 | 8.2   | 2.1      | .62  |
|       | $x_{.95}$ | -     | 19    | .064 | .05   | .99 | .97   | .38 | 12    | 3.9      | .71  |
| baffi | $x_{.5}$  | -     | 13    | .041 | .032  | .98 | .76   | .3  | 10    | 3        | .67  |
|       | $x_{.05}$ | -     | 9.3   | .019 | .015  | .97 | .52   | .22 | 8.2   | 2.1      | .62  |
|       | $x_{.95}$ | -     | 19    | .064 | .05   | .99 | .98   | .38 | 12    | 3.9      | .71  |

| $M$   | $c_h$ | $N_t$ | $d_t$ | $\dot{r}_t$ | $\beta_a$ |
|-------|-------|-------|-------|-------------|-----------|
| smith | .058  | 16    | 1     | .00051      | -         |
|       | .0064 | 5.3   | .98   | .00015      | -         |
|       | .32   | 44    | 1     | .0017       | -         |
| jones | .3    | 12    | .99   | .0016       | -         |
|       | .18   | 7.2   | .98   | .00089      | -         |
|       | .63   | 21    | 1     | .0029       | -         |
| ingle | .089  | 8.2   | .85   | .013        | .32       |
|       | .018  | 5.5   | .35   | .0081       | .23       |
|       | .36   | 11    | .97   | .02         | .46       |
| melvi | .15   | 3.2   | .46   | .035        | -         |
|       | .041  | 1.9   | .12   | .019        | -         |
|       | .5    | 5.3   | .82   | .054        | -         |
| somer | .45   | 45    | .93   | .0096       | -         |
|       | .14   | 34    | .61   | .005        | -         |
|       | .83   | 60    | .98   | .023        | -         |
| admir | .34   | 19    | .94   | .0077       | -         |
|       | .087  | 15    | .88   | .0051       | -         |
|       | .72   | 24    | .97   | .011        | -         |
| eclip | .41   | 12    | .88   | .015        | -         |
|       | .14   | 8.8   | .7    | .0089       | -         |
|       | .66   | 17    | .96   | .022        | -         |
| baffi | .51   | 12    | .93   | .0099       | -         |
|       | .2    | 8.3   | .84   | .0061       | -         |
|       | .83   | 18    | .97   | .015        | -         |

Table 6: **Parameter estimates** for the different models ( $M$ ). Estimates are given by the median ( $x_{.5}$ ) and the 90% credibility interval ( $x_{.05}$  -  $x_{.95}$ ) of the postreior distributions. Abundance is given in thousands. The selected models are indicated a superscript +



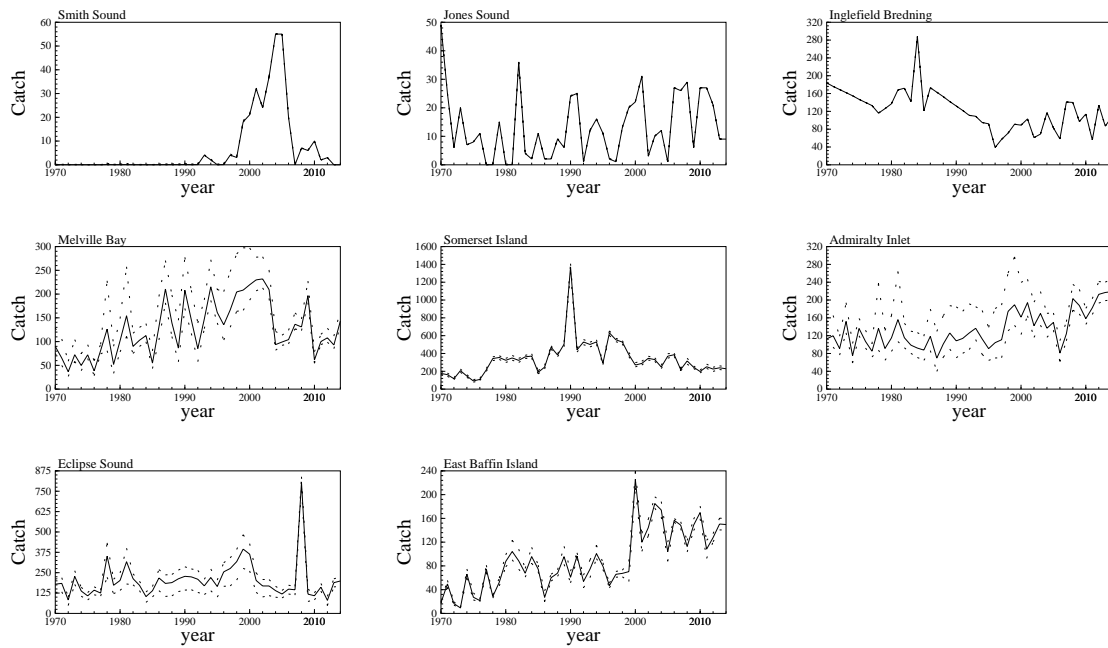

Figure 4: Yearly catches per summer aggregation with 90% confidence intervals.

| $P$  | smith | jones | ingle | melvi | somer | admir | eclip | baffi |
|------|-------|-------|-------|-------|-------|-------|-------|-------|
| $F$  | 0.50  | 0.50  | 0.50  | 0.50  | 0.50  | 0.50  | 0.50  | 0.50  |
| 0.50 | 279   | 227   | 156   | 123   | 988   | 376   | 263   | 251   |
| 0.55 | 254   | 214   | 146   | 117   | 952   | 358   | 251   | 239   |
| 0.60 | 230   | 201   | 136   | 111   | 916   | 339   | 239   | 228   |
| 0.65 | 209   | 187   | 126   | 105   | 880   | 319   | 227   | 215   |
| 0.70 | 188   | 173   | 116   | 99    | 841   | 299   | 214   | 201   |
| 0.75 | 167   | 158   | 107   | 92    | 802   | 278   | 202   | 187   |
| 0.80 | 146   | 143   | 95    | 84    | 761   | 255   | 189   | 173   |
| 0.85 | 123   | 128   | 83    | 73    | 714   | 229   | 174   | 158   |
| 0.90 | 100   | 110   | 68    | 59    | 665   | 200   | 157   | 138   |
| 0.95 | 73    | 87    | 46    | 42    | 585   | 161   | 129   | 113   |

Table 7: **Catch objective trade-off per stock.** The total annual removals per stock that meet given probabilities ( $P$ ) of meeting management objectives. The simulated period is from 2015 to 2020, and  $F$  is the assumed fraction of females in the catch.

| Hunt        | Season | C0  | C1  |
|-------------|--------|-----|-----|
| Etah        | Spring | 4   | 5   |
| Qaanaaq     | Summer | 98  | 98  |
| Grise Fjord | Spring | 7   | 9   |
| Grise Fjord | Summer | 11  | 15  |
| Grise Fjord | Fall   | 0   | 0   |
| Upernavik   | Summer | 100 | 70  |
| Ummannaq    | Fall   | 86  | 154 |
| Disko Bay   | Winter | 73  | 97  |
| CCA         | Spring | 4   | 6   |
| CCA         | Summer | 74  | 118 |
| CCA         | Fall   | 2   | 3   |
| Arctic Bay  | Spring | 31  | 41  |
| Arctic Bay  | Summer | 141 | 188 |
| Arctic Bay  | Fall   | 0   | 0   |
| Pond Inlet  | Spring | 58  | 77  |
| Pond Inlet  | Summer | 55  | 73  |
| Pond Inlet  | Fall   | 4   | 5   |
| BIC         | Spring | 12  | 11  |
| BIC         | Summer | 100 | 91  |
| BIC         | Fall   | 44  | 40  |
| BIS         | Spring | 5   | 5   |
| BIS         | Summer | 9   | 8   |
| BIS         | Fall   | 12  | 11  |
| BIS         | Winter | 0   | 0   |

Table 8: Catch option examples (C#) of maximum yearly removal per hunting region.

|    | Smith                                | Jones                                | Inglefield                           | Melville                             | Somerset                             | Admiralty                            | Eclipse                              | Baffin                               |
|----|--------------------------------------|--------------------------------------|--------------------------------------|--------------------------------------|--------------------------------------|--------------------------------------|--------------------------------------|--------------------------------------|
| C0 | 4 <sub>4</sub> <sup>4</sup>          | 18 <sub>18</sub> <sup>18</sup>       | 98 <sub>98</sub> <sup>98</sup>       | 110 <sub>102</sub> <sup>132</sup>    | 224 <sub>201</sub> <sup>248</sup>    | 214 <sub>180</sub> <sup>260</sup>    | 114 <sub>84</sub> <sup>141</sup>     | 143 <sub>131</sub> <sup>156</sup>    |
| P0 | 1.00 <sub>1.00</sub> <sup>1.00</sup> | 1.00 <sub>1.00</sub> <sup>1.00</sup> | 0.79 <sub>0.79</sub> <sup>0.79</sup> | 0.51 <sub>0.34</sub> <sup>0.57</sup> | 1.00 <sub>1.00</sub> <sup>1.00</sup> | 0.88 <sub>0.79</sub> <sup>0.93</sup> | 0.97 <sub>0.93</sub> <sup>0.99</sup> | 0.89 <sub>0.85</sub> <sup>0.91</sup> |
| C1 | 5 <sub>5</sub> <sup>5</sup>          | 24 <sub>24</sub> <sup>24</sup>       | 98 <sub>98</sub> <sup>98</sup>       | 84 <sub>73</sub> <sup>114</sup>      | 350 <sub>321</sub> <sup>378</sup>    | 280 <sub>237</sub> <sup>339</sup>    | 147 <sub>109</sub> <sup>183</sup>    | 130 <sub>119</sub> <sup>142</sup>    |
| P1 | 1.00 <sub>1.00</sub> <sup>1.00</sup> | 1.00 <sub>1.00</sub> <sup>1.00</sup> | 0.79 <sub>0.79</sub> <sup>0.79</sup> | 0.7 <sub>0.48</sub> <sup>0.77</sup>  | 1.00 <sub>1.00</sub> <sup>1.00</sup> | 0.75 <sub>0.6</sub> <sup>0.84</sup>  | 0.92 <sub>0.82</sub> <sup>0.97</sup> | 0.92 <sub>0.89</sub> <sup>0.94</sup> |

Table 9: Examples of future annual removals (C#) per summer aggregation, with associated probabilities (P#) of fulfilling management objectives. The different removals follow from the catch options in Table 8, and the 90% confidence intervals of the estimates are given by the sub and super scripts.

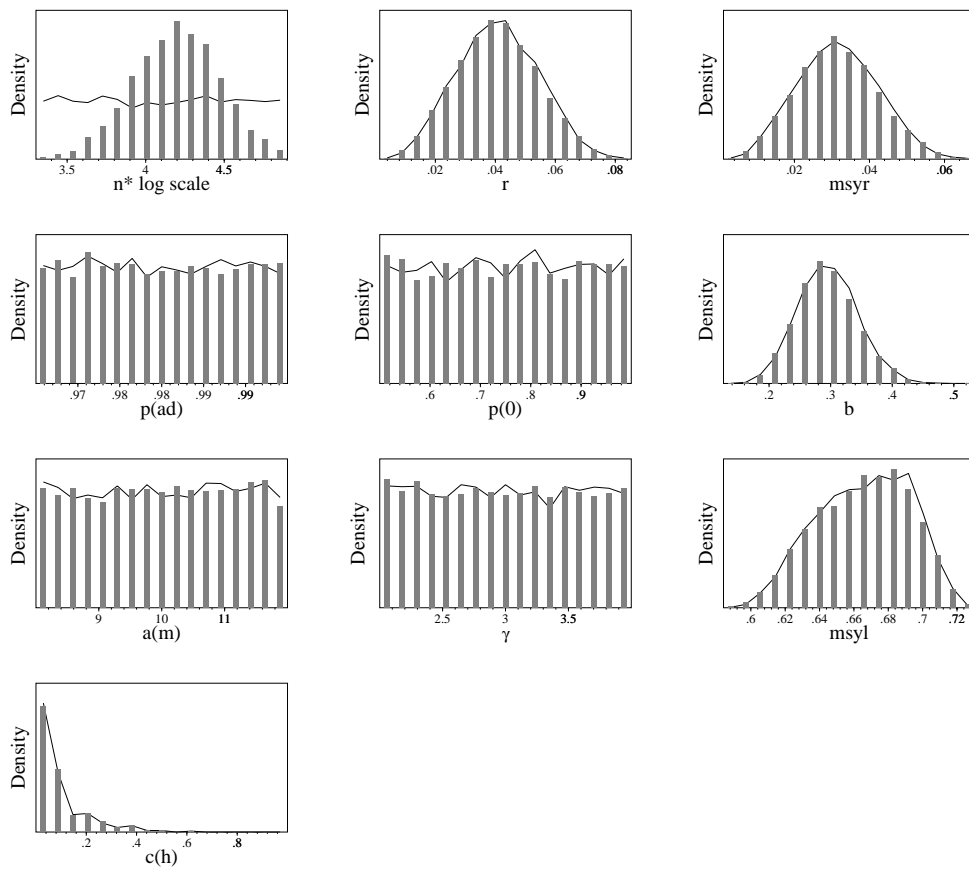

Figure 5: **Smith Sound** Realised prior (curve) and posterior (bars) distributions.

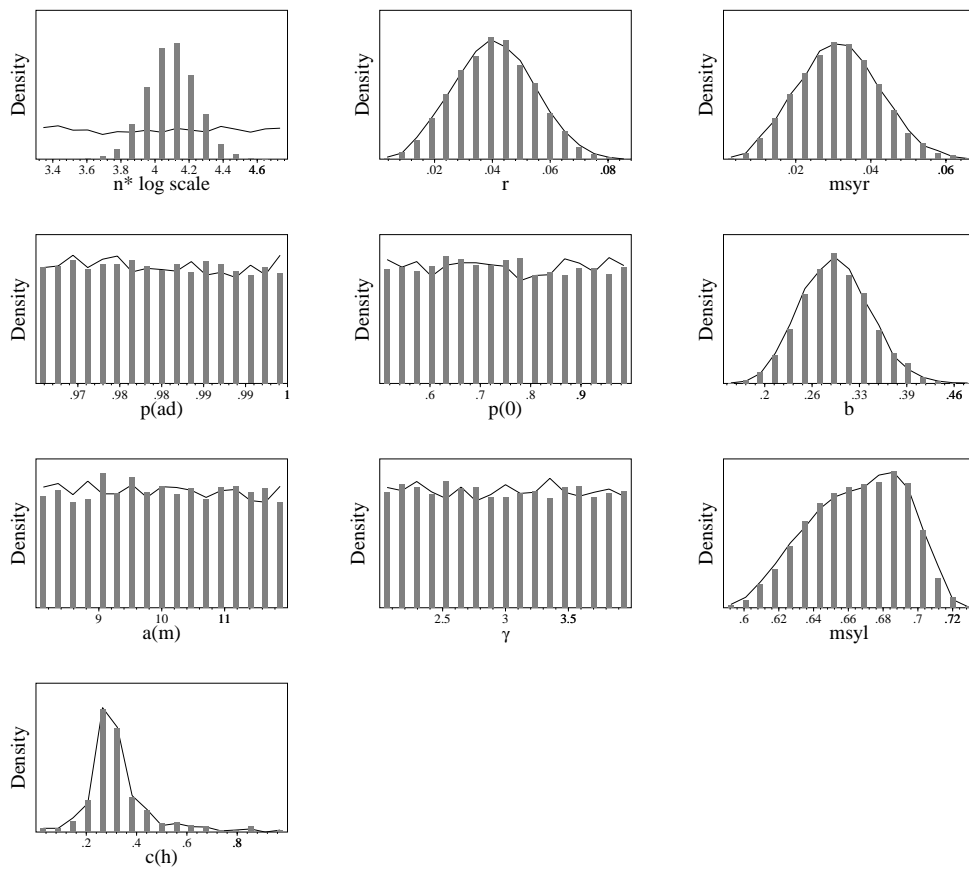

Figure 6: **Jones Sound** Realised prior (curve) and posterior (bars) distributions.

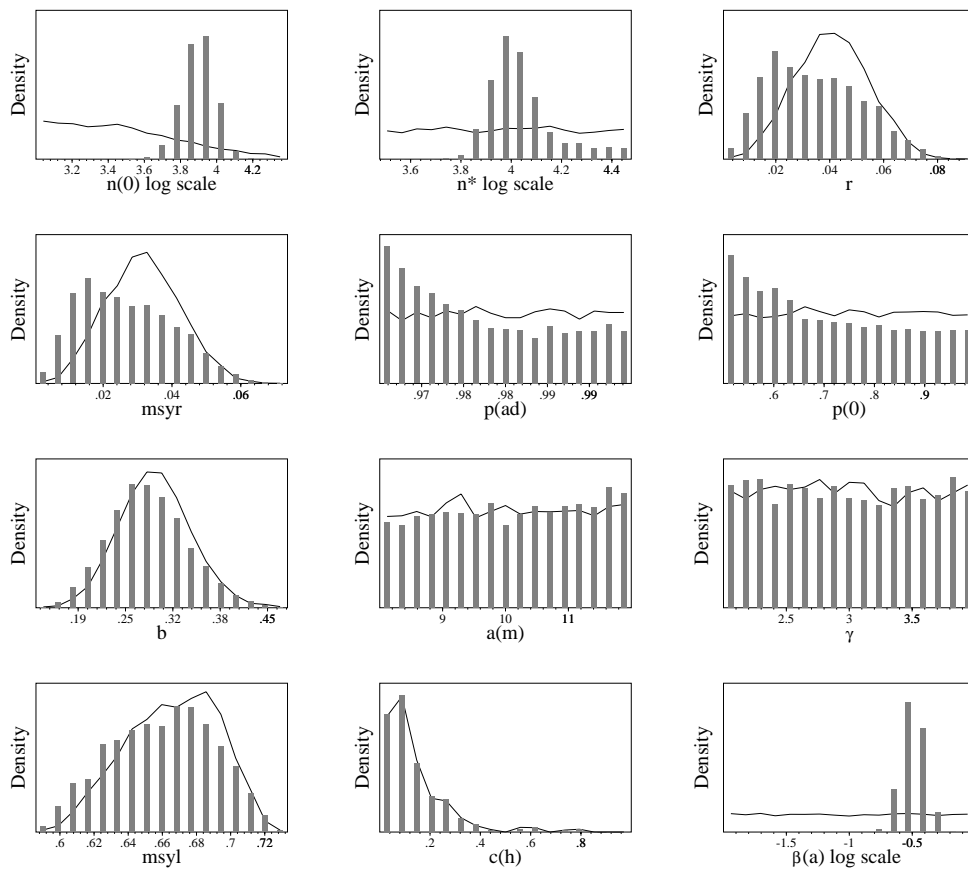

Figure 7: Ingelfield Bredning Realised prior (curve) and posterior (bars) distributions.

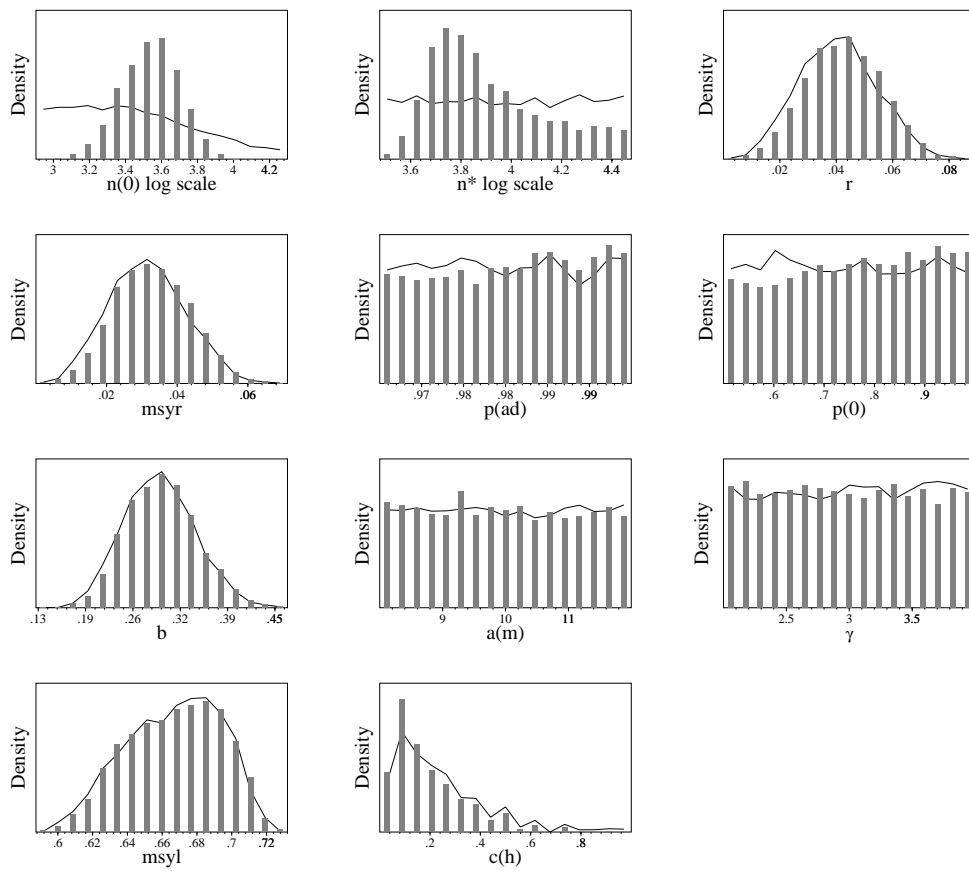

Figure 8: Melville Bay Realised prior (curve) and posterior (bars) distributions.

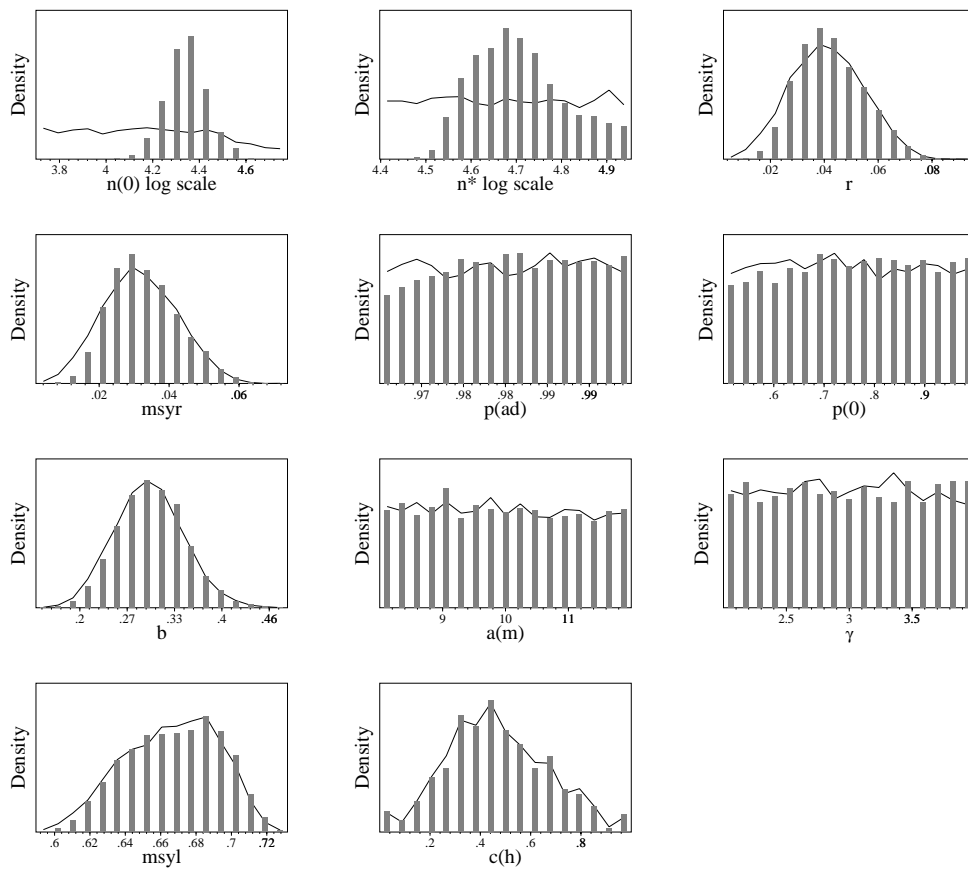

Figure 9: **Somerset Island** Realised prior (curve) and posterior (bars) distributions.

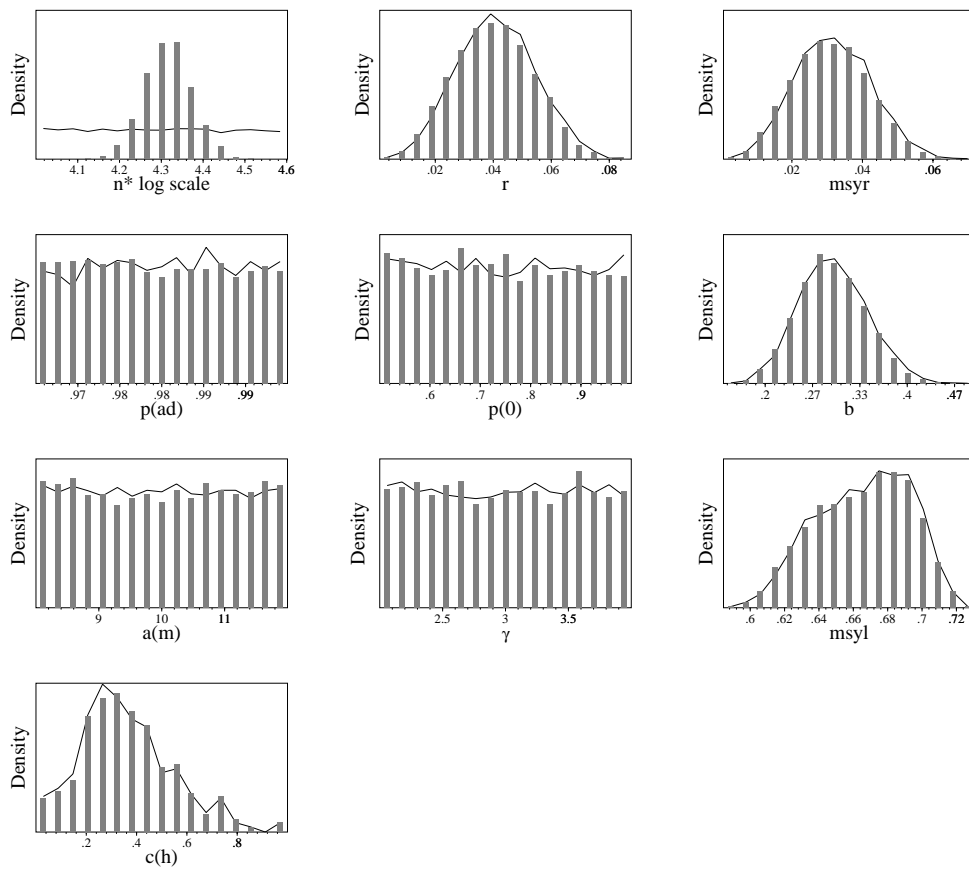

Figure 10: **Admiralty Inlet** Realised prior (curve) and posterior (bars) distributions.



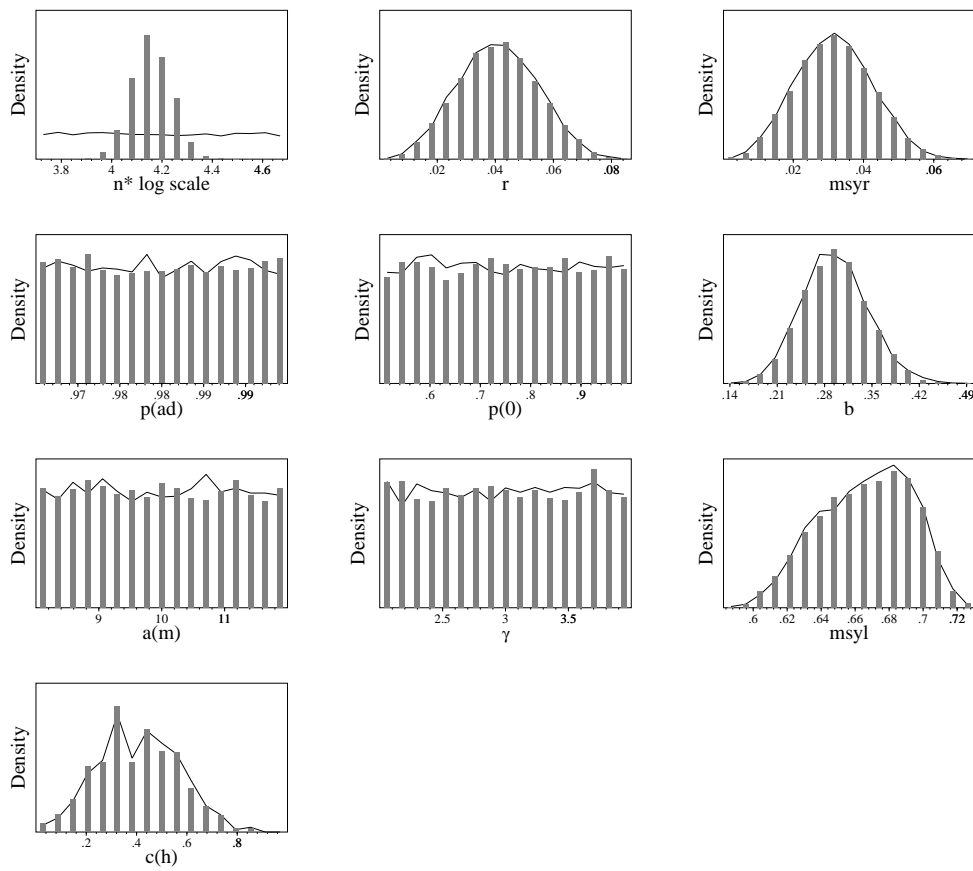

Figure 11: **Eclipse Sound** Realised prior (curve) and posterior (bars) distributions.

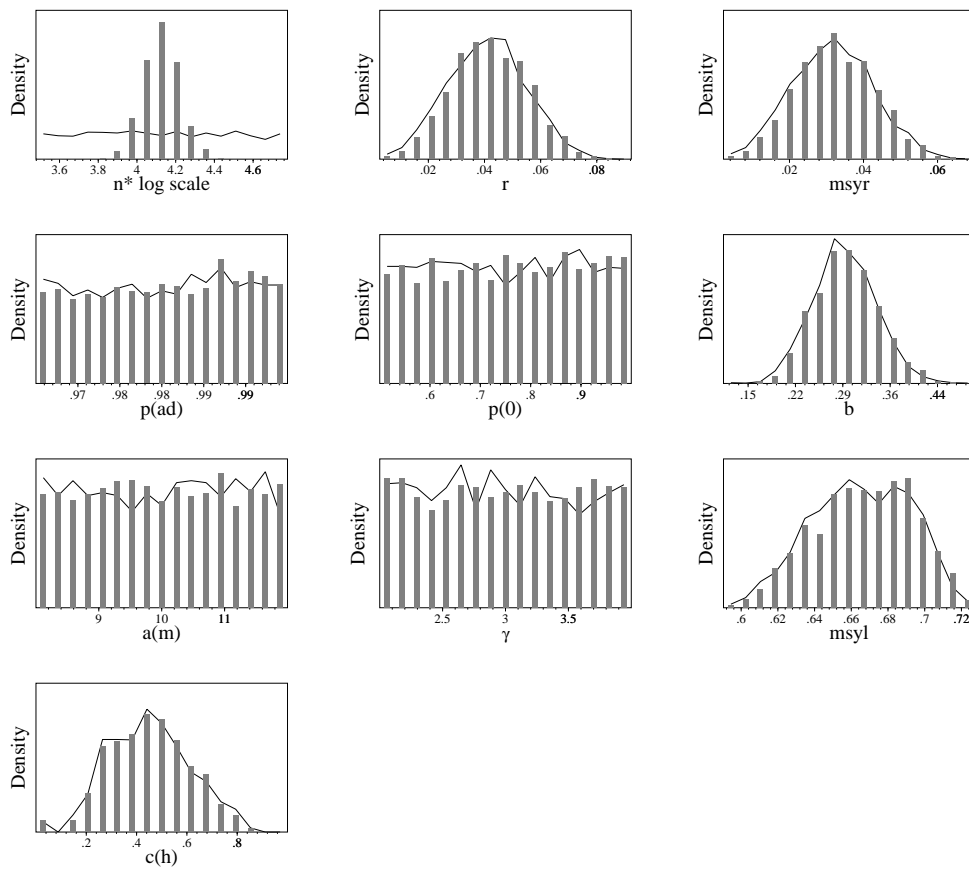

Figure 12: **East Baffin Island** Realised prior (curve) and posterior (bars) distributions.

| Year | $E_s$ | $Q_s$ | $U_{p_s}$ | $U_{m_f}$ | $D_w$ |
|------|-------|-------|-----------|-----------|-------|
| 1970 | 0     | 184   | 70        | 86        | 129   |
| 1971 | 0     | 176   | 45        | 60        | 134   |
| 1972 | 0     | 169   | 24        | 35        | 78    |
| 1973 | 0     | 162   | 53        | 83        | 120   |
| 1974 | 0     | 155   | 35        | 61        | 83    |
| 1975 | 0     | 147   | 62        | 14        | 66    |
| 1976 | 0     | 140   | 25        | 35        | 74    |
| 1977 | 0     | 133   | 71        | 147       | 40    |
| 1978 | 0     | 116   | 64        | 238       | 342   |
| 1979 | 0     | 126   | 25        | 172       | 134   |
| 1980 | 0     | 137   | 70        | 190       | 163   |
| 1981 | 0     | 168   | 95        | 182       | 348   |
| 1982 | 0     | 172   | 68        | 211       | 99    |
| 1983 | 0     | 142   | 83        | 213       | 88    |
| 1984 | 0     | 288   | 92        | 273       | 87    |
| 1985 | 0     | 121   | 39        | 51        | 88    |
| 1986 | 0     | 173   | 93        | 126       | 203   |
| 1987 | 0     | 163   | 167       | 434       | 203   |
| 1988 | 0     | 153   | 98        | 294       | 203   |
| 1989 | 0     | 142   | 43        | 374       | 203   |
| 1990 | 0     | 132   | 146       | 1325      | 203   |
| 1991 | 0     | 122   | 104       | 290       | 203   |
| 1992 | 0     | 111   | 43        | 374       | 203   |
| 1993 | 4     | 109   | 117       | 391       | 134   |
| 1994 | 2     | 95    | 173       | 386       | 203   |
| 1995 | 0     | 92    | 130       | 207       | 163   |
| 1996 | 0     | 39    | 89        | 527       | 224   |
| 1997 | 4     | 57    | 113       | 495       | 272   |
| 1998 | 3     | 71    | 147       | 447       | 295   |
| 1999 | 18    | 91    | 150       | 329       | 335   |
| 2000 | 21    | 89    | 177       | 138       | 255   |
| 2001 | 32    | 103   | 198       | 124       | 182   |
| 2002 | 24    | 61    | 204       | 234       | 163   |
| 2003 | 37    | 69    | 182       | 226       | 157   |
| 2004 | 55    | 117   | 78        | 87        | 99    |
| 2005 | 55    | 83    | 89        | 209       | 51    |
| 2006 | 20    | 58    | 92        | 94        | 73    |
| 2007 | 0     | 141   | 123       | 87        | 86    |
| 2008 | 7     | 140   | 120       | 113       | 61    |
| 2009 | 6     | 97    | 177       | 118       | 116   |
| 2010 | 10    | 114   | 52        | 55        | 59    |
| 2011 | 2     | 56    | 91        | 100       | 52    |
| 2012 | 3     | 134   | 96        | 55        | 72    |
| 2013 | 0     | 87    | 82        | 101       | 66    |
| 2014 | 0     | 107   | 130       | 90        | 81    |

Table 10: Estimated total removal per hunting region in Greenland per year.  $E_s$ :Etah (Spring).  $Q_s$ :Qaanaaq (Summer).  $U_{p_s}$ :Upernavik (Summer).  $U_{m_f}$ :Ummannaq (Fall).  $D_w$ :Disko Bay (Winter).

| Year | G <sub>s</sub> | G <sub>s</sub> | G <sub>f</sub> | C <sub>s</sub> | C <sub>s</sub> | C <sub>f</sub> | A <sub>s</sub> | A <sub>s</sub> | A <sub>f</sub> | P <sub>s</sub> | P <sub>s</sub> | P <sub>f</sub> | B <sub>s</sub> | B <sub>s</sub> | B <sub>f</sub> | S <sub>s</sub> | S <sub>s</sub> | S <sub>f</sub> | S <sub>w</sub> |
|------|----------------|----------------|----------------|----------------|----------------|----------------|----------------|----------------|----------------|----------------|----------------|----------------|----------------|----------------|----------------|----------------|----------------|----------------|----------------|
| 1970 | 10             | 39             | 0              | 1              | 24             | 23             | 65             | 34             | 0              | 58             | 64             | 1              | 2              | 11             | 7              | 3              | 1              | 1              | 0              |
| 1971 | 5              | 20             | 0              | 1              | 26             | 24             | 69             | 33             | 0              | 58             | 62             | 1              | 5              | 27             | 20             | 17             | 3              | 1              | 0              |
| 1972 | 1              | 5              | 0              | 1              | 28             | 21             | 60             | 41             | 0              | 13             | 18             | 0              | 1              | 4              | 3              | 10             | 4              | 4              | 0              |
| 1973 | 4              | 16             | 0              | 2              | 49             | 4              | 89             | 61             | 0              | 84             | 113            | 3              | 1              | 7              | 4              | 0              | 0              | 0              | 0              |
| 1974 | 0              | 7              | 0              | 1              | 28             | 19             | 31             | 21             | 0              | 42             | 57             | 1              | 9              | 37             | 26             | 24             | 3              | 0              | 0              |
| 1975 | 0              | 8              | 0              | 0              | 6              | 0              | 99             | 68             | 0              | 32             | 44             | 1              | 2              | 11             | 7              | 24             | 3              | 0              | 0              |
| 1976 | 2              | 9              | 0              | 1              | 13             | 1              | 68             | 47             | 0              | 53             | 71             | 2              | 2              | 12             | 7              | 6              | 2              | 2              | 0              |
| 1977 | 0              | 0              | 0              | 0              | 33             | 0              | 16             | 38             | 0              | 73             | 64             | 0              | 0              | 54             | 44             | 4              | 0              | 0              | 0              |
| 1978 | 0              | 0              | 0              | 2              | 26             | 5              | 72             | 12             | 0              | 102            | 91             | 0              | 4              | 18             | 17             | 2              | 0              | 0              | 0              |
| 1979 | 0              | 15             | 0              | 0              | 3              | 156            | 29             | 13             | 0              | 60             | 60             | 0              | 15             | 21             | 2              | 22             | 14             | 0              | 0              |
| 1980 | 0              | 0              | 0              | 1              | 31             | 0              | 120            | 8              | 0              | 65             | 58             | 0              | 11             | 54             | 42             | 24             | 0              | 0              | 0              |
| 1981 | 0              | 0              | 0              | 1              | 38             | 29             | 110            | 18             | 0              | 56             | 49             | 0              | 11             | 56             | 44             | 54             | 3              | 0              | 0              |
| 1982 | 0              | 36             | 0              | 3              | 57             | 0              | 59             | 53             | 3              | 0              | 128            | 0              | 9              | 43             | 37             | 60             | 3              | 0              | 0              |
| 1983 | 0              | 4              | 0              | 0              | 73             | 0              | 102            | 25             | 1              | 41             | 92             | 0              | 25             | 47             | 13             | 3              | 1              | 0              | 0              |
| 1984 | 0              | 2              | 0              | 0              | 0              | 0              | 115            | 4              | 0              | 48             | 10             | 0              | 9              | 56             | 44             | 41             | 1              | 0              | 0              |
| 1985 | 1              | 10             | 0              | 3              | 19             | 3              | 128            | 0              | 0              | 71             | 54             | 0              | 5              | 63             | 1              | 22             | 1              | 0              | 0              |
| 1986 | 0              | 2              | 0              | 1              | 11             | 3              | 110            | 18             | 0              | 68             | 60             | 0              | 2              | 8              | 6              | 38             | 2              | 0              | 0              |
| 1987 | 0              | 2              | 0              | 1              | 12             | 2              | 28             | 4              | 0              | 35             | 31             | 0              | 8              | 41             | 35             | 0              | 0              | 0              | 0              |
| 1988 | 0              | 9              | 0              | 1              | 17             | 2              | 95             | 15             | 0              | 36             | 32             | 0              | 10             | 48             | 32             | 2              | 0              | 0              | 0              |
| 1989 | 0              | 6              | 0              | 1              | 24             | 4              | 109            | 18             | 0              | 52             | 46             | 0              | 11             | 53             | 41             | 49             | 2              | 0              | 0              |
| 1990 | 3              | 21             | 0              | 0              | 28             | 0              | 74             | 12             | 0              | 33             | 55             | 0              | 4              | 26             | 68             | 3              | 2              | 1              | 0              |
| 1991 | 1              | 24             | 0              | 0              | 36             | 0              | 143            | 3              | 0              | 68             | 60             | 0              | 5              | 81             | 22             | 10             | 0              | 0              | 0              |
| 1992 | 1              | 0              | 0              | 0              | 33             | 0              | 131            | 0              | 0              | 97             | 30             | 0              | 5              | 20             | 69             | 5              | 0              | 0              | 0              |
| 1993 | 0              | 12             | 0              | 0              | 44             | 0              | 49             | 58             | 1              | 59             | 42             | 0              | 12             | 26             | 72             | 24             | 0              | 6              | 0              |
| 1994 | 3              | 13             | 0              | 0              | 43             | 0              | 116            | 10             | 0              | 52             | 64             | 0              | 10             | 79             | 6              | 42             | 0              | 0              | 0              |
| 1995 | 1              | 10             | 0              | 1              | 33             | 0              | 34             | 25             | 0              | 58             | 35             | 0              | 7              | 59             | 31             | 3              | 0              | 5              | 0              |
| 1996 | 1              | 1              | 0              | 0              | 19             | 0              | 127            | 0              | 0              | 44             | 84             | 0              | 1              | 20             | 21             | 10             | 14             | 0              | 0              |
| 1997 | 0              | 1              | 0              | 0              | 34             | 0              | 52             | 32             | 0              | 12             | 84             | 0              | 5              | 47             | 31             | 0              | 3              | 0              | 0              |
| 1998 | 2              | 11             | 0              | 1              | 67             | 0              | 20             | 97             | 0              | 22             | 113            | 0              | 0              | 48             | 38             | 2              | 2              | 1              | 0              |
| 1999 | 0              | 20             | 0              | 4              | 18             | 1              | 14             | 100            | 0              | 18             | 151            | 0              | 3              | 13             | 88             | 24             | 0              | 18             | 0              |
| 2000 | 0              | 22             | 0              | 5              | 45             | 1              | 68             | 60             | 0              | 50             | 164            | 0              | 9              | 134            | 92             | 9              | 44             | 0              | 0              |
| 2001 | 4              | 27             | 0              | 0              | 96             | 0              | 51             | 116            | 1              | 29             | 54             | 0              | 13             | 69             | 82             | 20             | 0              | 5              | 0              |
| 2002 | 3              | 0              | 0              | 0              | 58             | 0              | 23             | 77             | 0              | 50             | 30             | 0              | 0              | 99             | 63             | 8              | 1              | 29             | 0              |
| 2003 | 0              | 10             | 0              | 4              | 33             | 0              | 63             | 102            | 0              | 34             | 49             | 3              | 12             | 166            | 1              | 36             | 0              | 1              | 0              |
| 2004 | 0              | 12             | 0              | 0              | 72             | 0              | 83             | 74             | 0              | 28             | 53             | 3              | 32             | 136            | 19             | 12             | 1              | 19             | 0              |
| 2005 | 1              | 0              | 0              | 0              | 81             | 0              | 79             | 87             | 1              | 29             | 50             | 0              | 14             | 55             | 93             | 0              | 0              | 6              | 0              |
| 2006 | 0              | 27             | 0              | 1              | 172            | 0              | 161            | 5              | 0              | 28             | 82             | 3              | 5              | 148            | 14             | 0              | 0              | 1              | 0              |
| 2007 | 4              | 22             | 0              | 0              | 65             | 0              | 86             | 73             | 0              | 9              | 72             | 3              | 10             | 130            | 27             | 4              | 1              | 0              | 0              |
| 2008 | 0              | 29             | 0              | 0              | 59             | 3              | 61             | 108            | 0              | 173            | 682            | 37             | 3              | 58             | 64             | 0              | 27             | 0              | 0              |
| 2009 | 5              | 1              | 0              | 4              | 79             | 0              | 22             | 143            | 0              | 27             | 26             | 4              | 9              | 100            | 23             | 10             | 21             | 21             | 0              |
| 2010 | 10             | 17             | 0              | 3              | 73             | 0              | 49             | 115            | 0              | 22             | 47             | 10             | 18             | 136            | 24             | 14             | 1              | 20             | 0              |
| 2011 | 14             | 13             | 0              | 9              | 77             | 0              | 36             | 131            | 0              | 50             | 93             | 0              | 8              | 63             | 92             | 0              | 1              | 5              | 0              |
| 2012 | 3              | 18             | 0              | 1              | 82             | 10             | 4              | 156            | 0              | 124            | 0              | 0              | 9              | 102            | 31             | 0              | 4              | 9              | 0              |
| 2013 | 3              | 6              | 0              | 4              | 57             | 0              | 43             | 161            | 0              | 67             | 110            | 8              | 16             | 101            | 51             | 2              | 18             | 4              | 0              |
| 2014 | 3              | 6              | 0              | 4              | 57             | 0              | 43             | 161            | 0              | 67             | 110            | 8              | 16             | 101            | 51             | 2              | 18             | 4              | 0              |

Table 11: Estimated total removal per hunting region in Canada per year. G<sub>s</sub>:Grise Fjord (Spring). G<sub>s</sub>:Grise Fjord (Summer). G<sub>f</sub>:Grise Fjord (Fall). C<sub>s</sub>:CCA (Spring). C<sub>s</sub>:CCA (Summer). C<sub>f</sub>:CCA (Fall). A<sub>s</sub>:Arctic Bay (Spring). A<sub>s</sub>:Arctic Bay (Summer). A<sub>f</sub>:Arctic Bay (Fall). P<sub>s</sub>:Pond Inlet (Spring). P<sub>s</sub>:Pond Inlet (Summer). P<sub>f</sub>:Pond Inlet (Fall). B<sub>s</sub>:BIC (Spring). B<sub>s</sub>:BIC (Summer). B<sub>f</sub>:BIC (Fall). S<sub>s</sub>:BIS (Spring). S<sub>s</sub>:BIS (Summer). S<sub>f</sub>:BIS (Fall). S<sub>w</sub>:BIS (Winter).
